# Supplementary material
Source: PubMed Central journal article supplement (PMC3858172)
Supplement: NIHMS527730-supplement-01.pdf [file NIHMS527730-supplement-01.pdf]

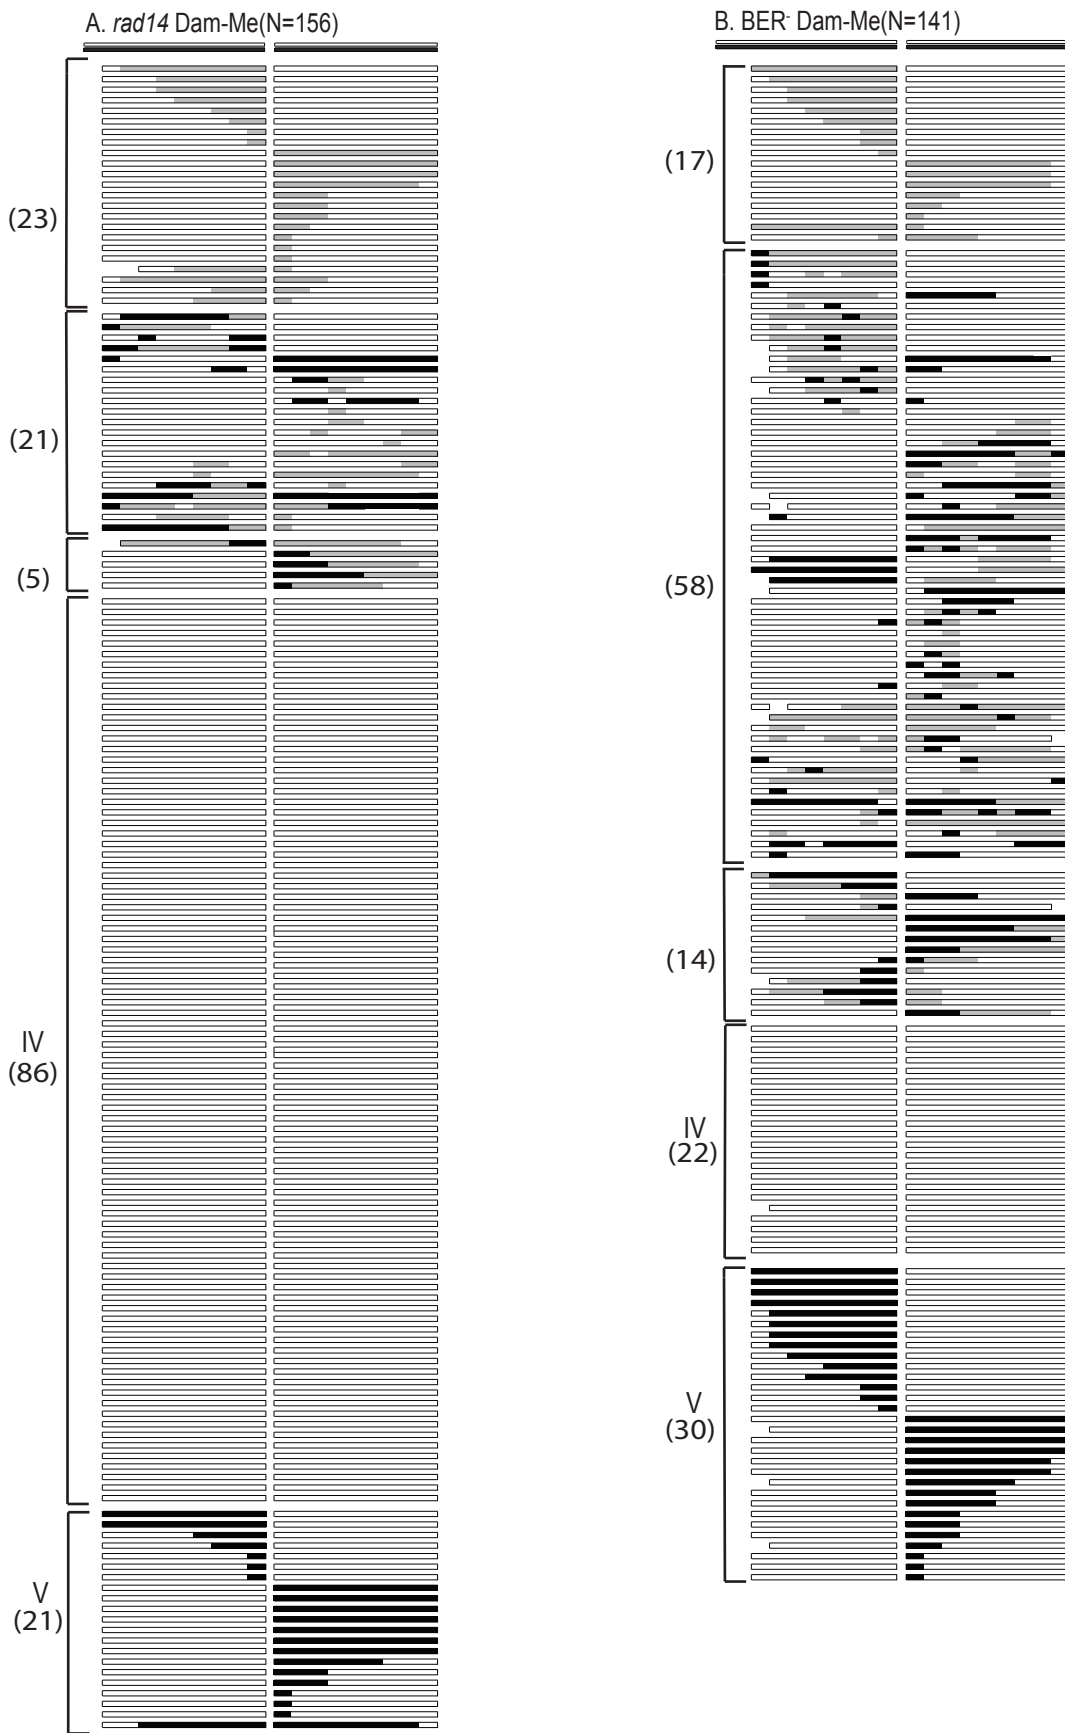

**Supplemental Fig 1.** Sequence analysis of NCO products in NER- and BER-deficient strains. DNA was isolated from individual His<sup>+</sup> colonies following transformation of (A) *rad14* or (B) BER<sup>-</sup> strain with Dam-Me plasmid that had been gel purified. Each horizontal line represents an independent repair event, with a box representing homology on each side of the gap. White areas correspond to plasmid sequence, black areas to chromosomal sequence and gray areas to hetDNA. Gaps in individual boxes correspond to an absence of sequence information. Classes I-V are described in the text and the number (N) in each category is indicated.
